# Supplementary material for: δ 13 C decreases in the upper western South Atlantic during Heinrich Stadials 3 and 2
Source: Copernicus journal article supplement (doi:10.5194/cp-13-345-2017), 2017-04-18
Supplement: Supplementary file 1 [file cp-13-345-2017-supplement.pdf]

Supplement of *Clim. Past*, 13, 345–358, 2017  
<http://www.clim-past.net/13/345/2017/>  
doi:10.5194/cp-13-345-2017-supplement  
© Author(s) 2017. CC Attribution 3.0 License.

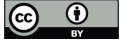

Climate  
of the Past

Open Access

The EGU logo features the letters 'EGU' in a bold, sans-serif font, with a stylized gear or circular arrow element behind the 'G'.

*Supplement of*

## **$\delta^{13}\text{C}$ decreases in the upper western South Atlantic during Heinrich Stadials 3 and 2**

**Marília C. Campos et al.**

*Correspondence to:* Marília C. Campos ([marilia.carvalho.campos@usp.br](mailto:marilia.carvalho.campos@usp.br))

The copyright of individual parts of the supplement might differ from the CC-BY 3.0 licence.

# 1 Stable oxygen isotope values of *G. ruber* and *G. inflata*

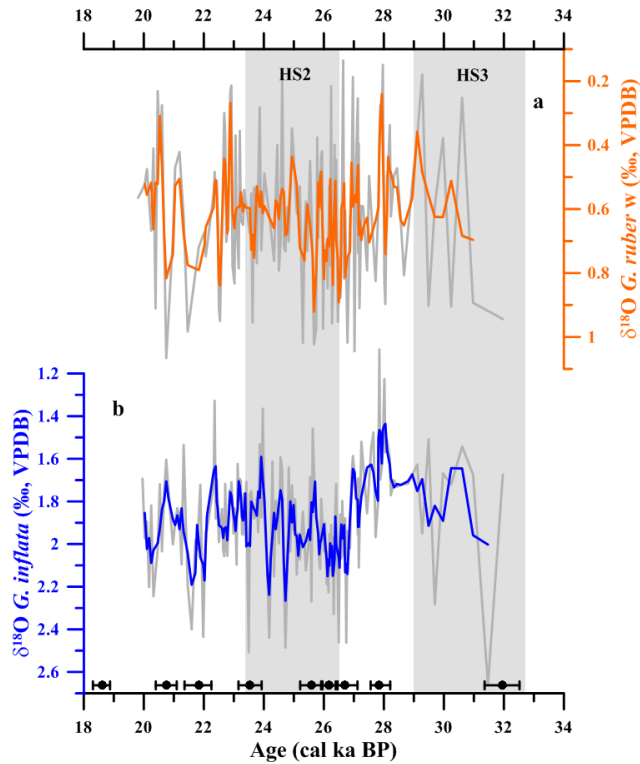

5 **Figure 1: Stable oxygen isotopic ( $\delta^{18}\text{O}$ ) records from sediment core GeoB6212-1. (a) *Globigerinoides ruber* white (*G. ruber* w)  $\delta^{18}\text{O}$  and (b) *Globorotalia inflata* (*G. inflata*)  $\delta^{18}\text{O}$ . Orange and blue lines represent three–point running averages for *G. ruber* w and *G. inflata*, respectively. Black symbols at the bottom of the panel depict calibrated ages. Grey vertical bars show abrupt millennial–scale climate change events Heinrich Stadial 3 (HS3) and Heinrich Stadial 2 (HS2) (Goni and Harrison, 2010; Sarnthein et al., 2001).**

## References

- Goni, M. F. S. and Harrison, S. P.: Millennial-scale climate variability and vegetation changes during the Last Glacial: Concepts and terminology Introduction, *Quaternary Sci Rev*, 29, 2823-2827, doi:10.1016/j.quascirev.2009.11.014, 2010.
- 10 Gordon, A. L.: South-Atlantic thermocline ventilation, *Deep-Sea Res*, 28, 1239-1264, doi:10.1016/0198-0149(81)90033-9, 1981.
- Sarnthein, M., Stattegger, K., Dreger, D., Erlenkeuser, H., Grootes, P., Haupt, B. J., Jung, S., Kiefer, T., Kuhnt, W., Pflaumann, U., Schafer-Neth, C., Schulz, H., Schulz, M., Seidov, D., Simstich, J., van Kreveld, S., Vogelsang, E., Volker, A., and Weinelt, M.: Fundamental modes and abrupt changes in north Atlantic circulation and climate over the last 60 ky - Concepts, reconstruction and numerical modeling in: *The Northern North Atlantic: A Changing Environment*, edited by: Schäfer, P., Ritzrau, W., Schlüter, M., and Thiede, J., Springer, Berlin, 365–410, 2001.
- 15
